# Supplementary material
Source: Springer Nature journal article supplement (https://www.springermedizin.de/resource/supplementary/12936_2009_1115_MOESM3_ESM.pdf/9549768)

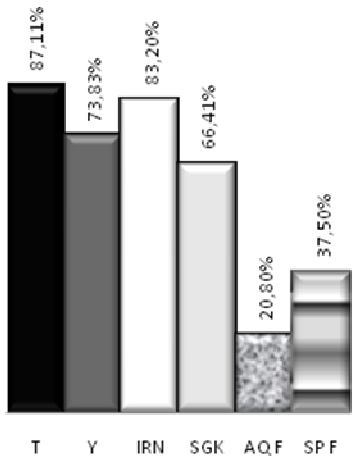

**Mutengene**

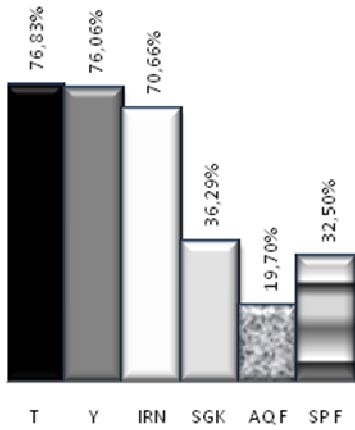

**Yaounde**

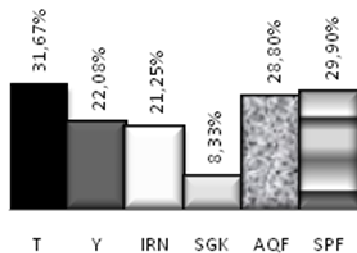

**Garoua**

Supplement: MOESM3 [file 9549768]
